# Supplementary material for: ADAM8 Is an Antigen of Tyrosine Kinase Inhibitor-Resistant Chronic Myeloid Leukemia Cells Identified by Patient-Derived Induced Pluripotent Stem Cells
Source: PubMed Central journal article supplement — Stem Cell Reports. 2018 Feb 8;10(3):1115–30. doi: 10.1016/j.stemcr.2018.01.015 (PMC5919294; doi:10.1016/j.stemcr.2018.01.015), 2018-02-08
Supplement: mmc1.pdf [file mmc1.pdf]

**Stem Cell Reports, Volume 10**

**Supplemental Information**

**ADAM8 Is an Antigen of Tyrosine Kinase Inhibitor-Resistant Chronic Myeloid Leukemia Cells Identified by Patient-Derived Induced Pluripotent Stem Cells**

**Masashi Miyauchi, Junji Koya, Shunya Arai, Sho Yamazaki, Akira Honda, Keisuke Kataoka, Akihide Yoshimi, Kazuki Taoka, Keiki Kumano, and Mineo Kurokawa**

1 **Experimental Procedures**

2  
3 **Transduction of CML cell lines**

4 To obtain retrovirus supernatants, Plat-A packaging cells were transiently transfected with  
5 pMXs-ADAM8-flag-neo. 48 hr later, the viral supernatant was collected and utilized for infection. The  
6 vector-transduced cells were selected by medium containing G418 (0.8 mg/ml for K562 and 1.2 mg/ml for NCO2).

7 **Immunoblotting**

8 Cell lysates were subjected to sodium dodecyl sulfate polyacrylamide gel electrophoresis (SDS-PAGE)  
9 and immunoblotting. Membranes were probed with the following antibodies: anti-flag (Sigma), anti-c-Abl (Cell  
10 Signaling Technology) and anti-β-actin (Cell Signaling Technology). Blots were detected using an ImmunoStar  
11 Zeta (Wako Pure Chemical Industries) and an LAS-3000 image analyzer (Fujifilm), as recommended by the  
12 manufacturers.

13 **Immunofluorescence analysis**

14 Lin-/c-Kit+/BCR-ABL+ cells were purified from BM of a murine model of CML. A total of  $2 \times 10^4$  to  $5$   
15  $\times 10^4$  cells were cytopspun onto glass slides. The cells were fixed with 3.7% formaldehyde in PBS for 30 minutes,  
16 permeabilized by treatment with 0.2% Triton X in PBS for 10 minutes, and blocked with 1% BSA in PBS for 60  
17 minutes. Then, the slides were incubated with rabbit anti-ADAM8 polyclonal antibody (bs-4195R; 1:100 dilution;  
18 Bioss ANTIBODIES) overnight at 4°C, followed by incubation with Alexa Fluor 555 goat anti-rabbit IgG (1:250  
19 dilution; Thermo Fisher SCIENTIFIC) for 3 hr. After the cells were washed, they were treated with ProLong Gold  
20 Antifade Reagent with DAPI (Thermo Fisher SCIENTIFIC). Fluorescence images were captured with BZ-X710  
21 All-in-One Fluorescence Microscope (KEYENCE).

22 **Retrovirus production and a murine model of CML**

23 To obtain retrovirus supernatants, Plat-E packaging cells were transiently transfected with  
24 pGCDNsam-BCR-ABL-IRES-GFP. c-Kit+ sorted C57/B6 mouse BM cells were purified and incubated in α-MEM  
25 with 20% FCS, 1% PS and cytokines (50 ng/ml SCF, 50 ng/ml TPO, 10 ng/ml IL-6) at 37 °C in a 5% CO<sub>2</sub> incubator  
26 for 24 hr, as previously described (Sato *et al.*, 2014). Subsequently, cultured cells were infected with retrovirus in  
27 the presence of RetroNectin (Takara Bio Inc.). The infected cells were collected 48 h after retrovirus infection, and  
28 vector-transduced cells were injected into lethally irradiated (9.5 Gy) recipient mice.

29 **Cell-cycle analysis**

30 For cell-cycle analyses with anti-Ki67 antibody and Hoechst 33342, we followed the protocol described  
31 earlier with minor modification (Wilson *et al.*, 2008).

32

1 **SUPPLEMENTAL FIGURES**  
Supplemental Figure 1

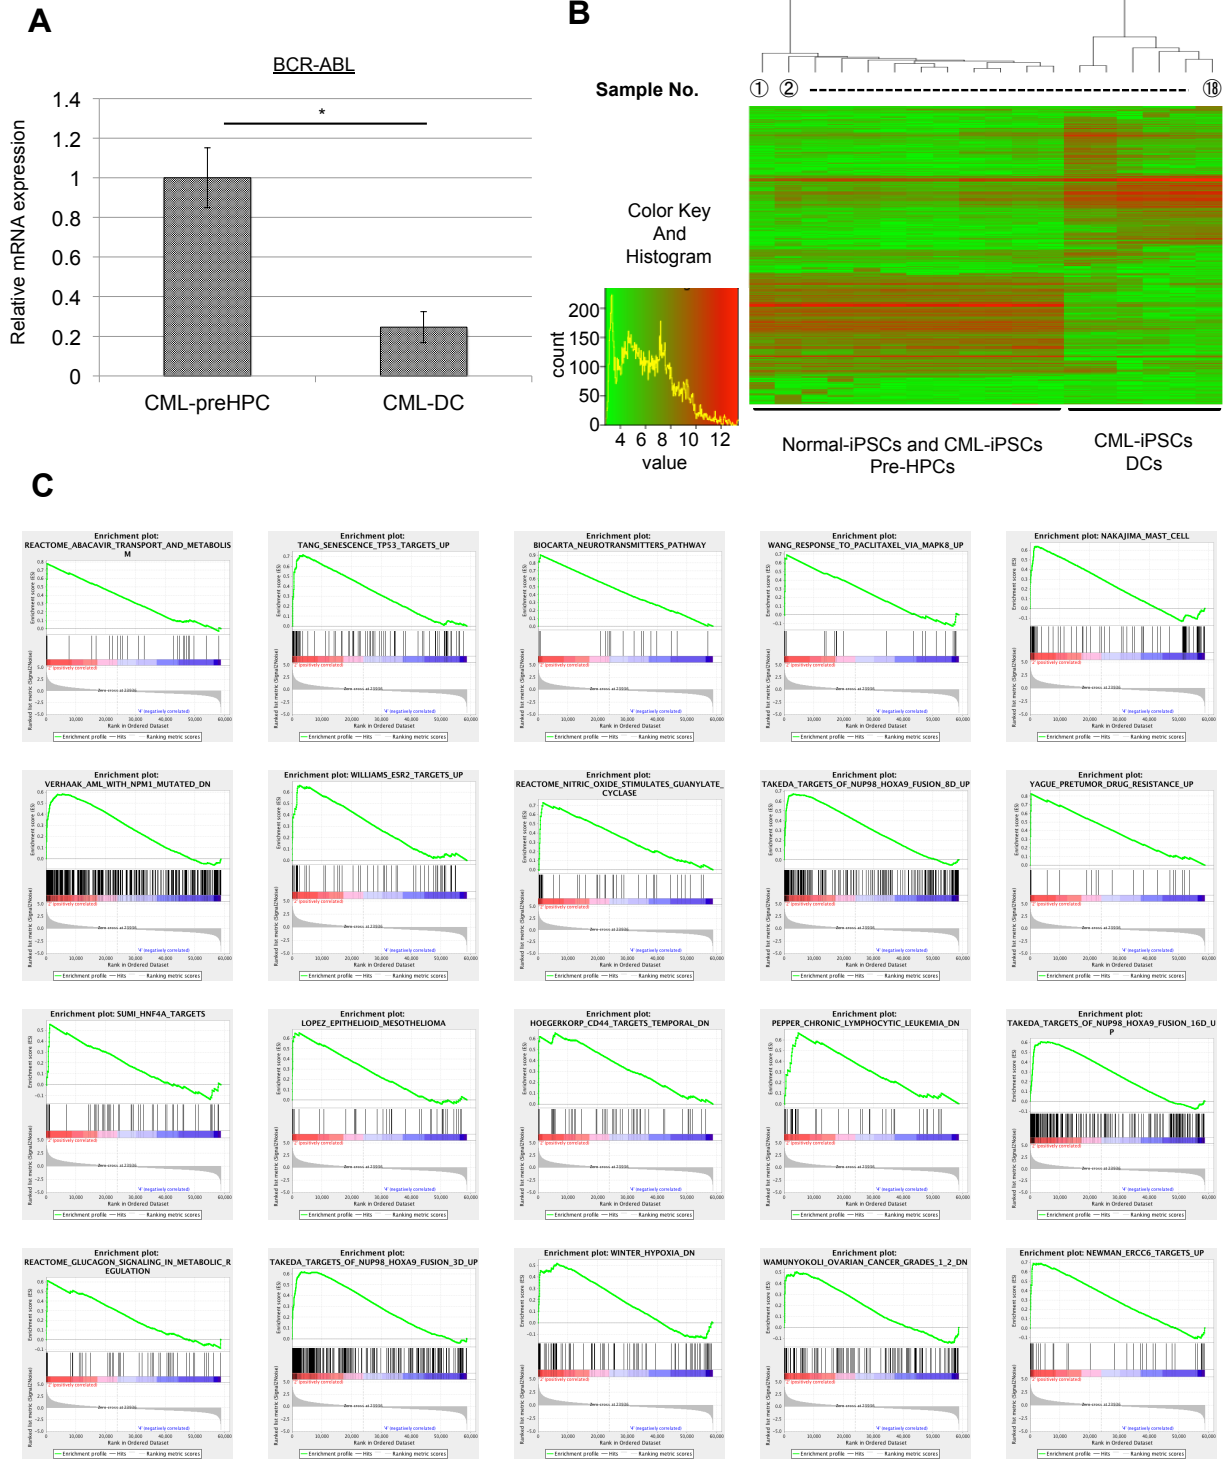

Supplemental Figure 2

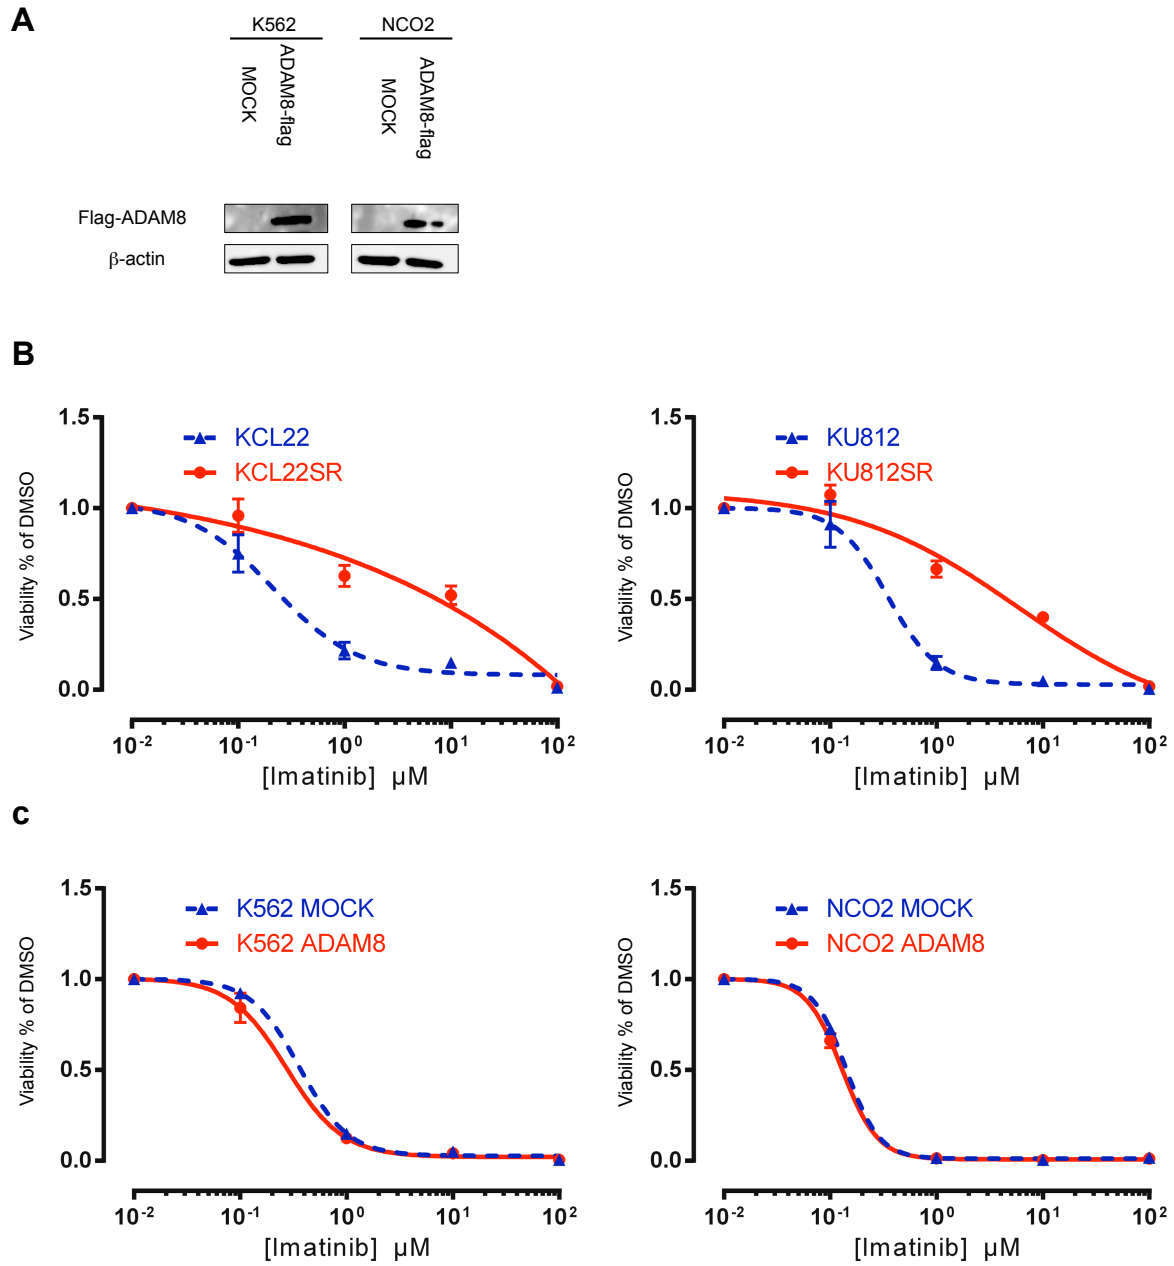

1

Supplemental Figure 3

**A**

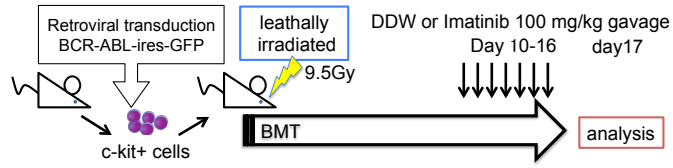

**B**

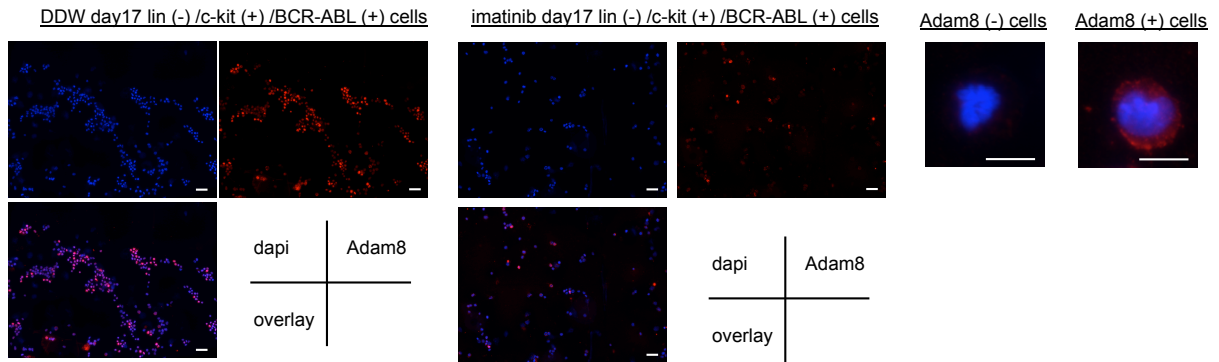

**C**

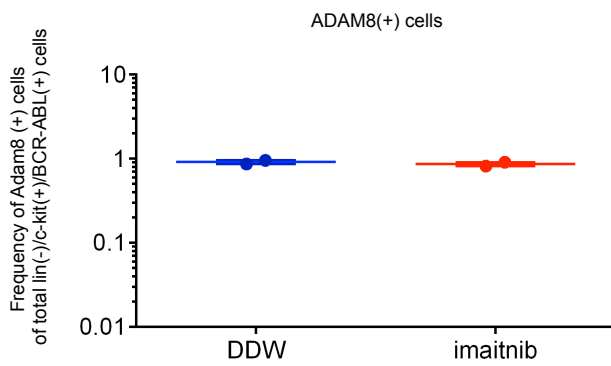

Supplemental Figure 4

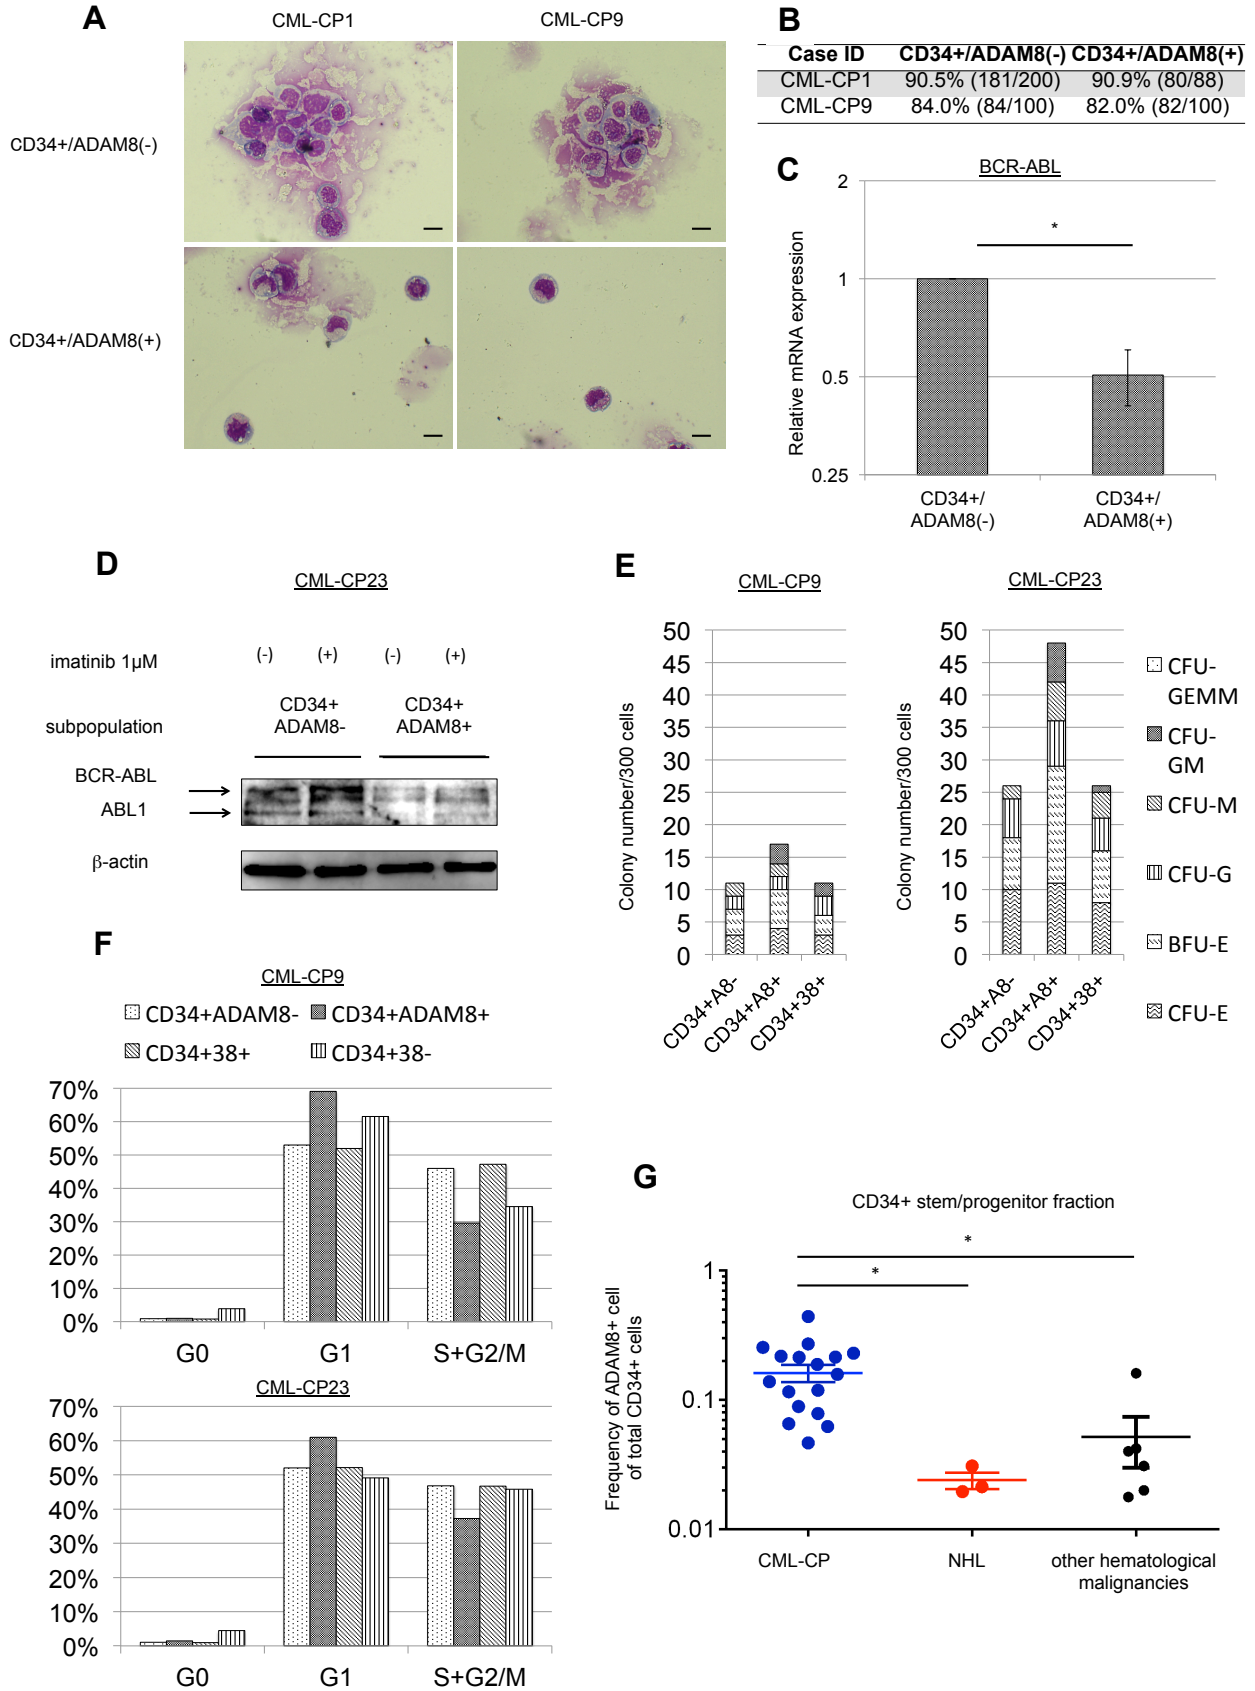

Supplemental Figure 5

**A**

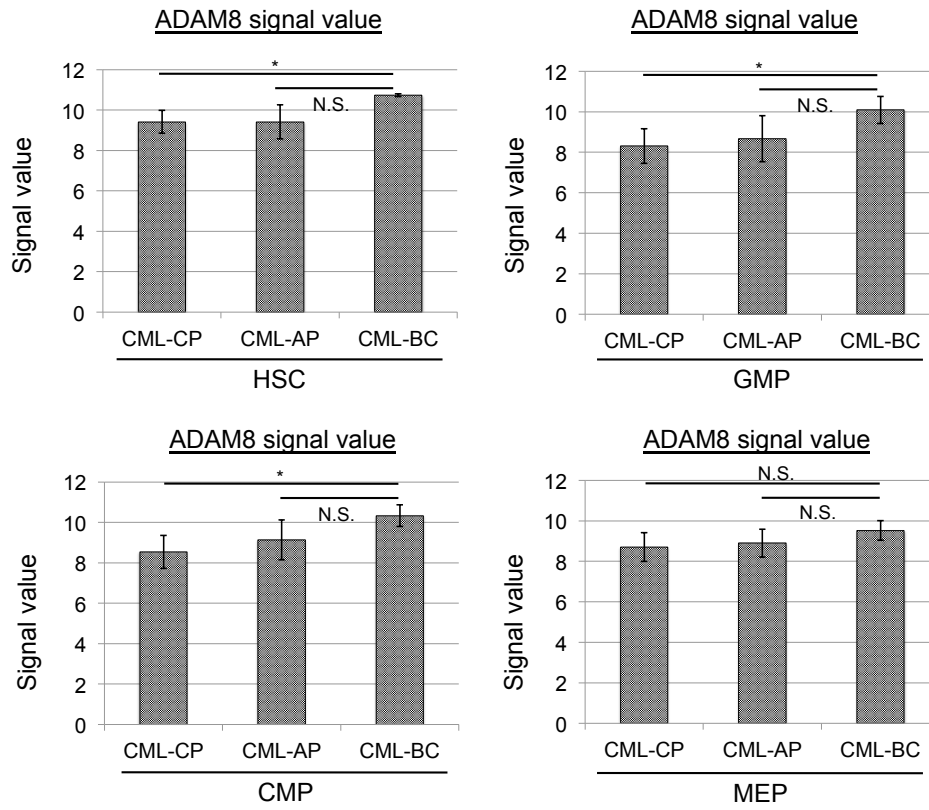

1

**A**

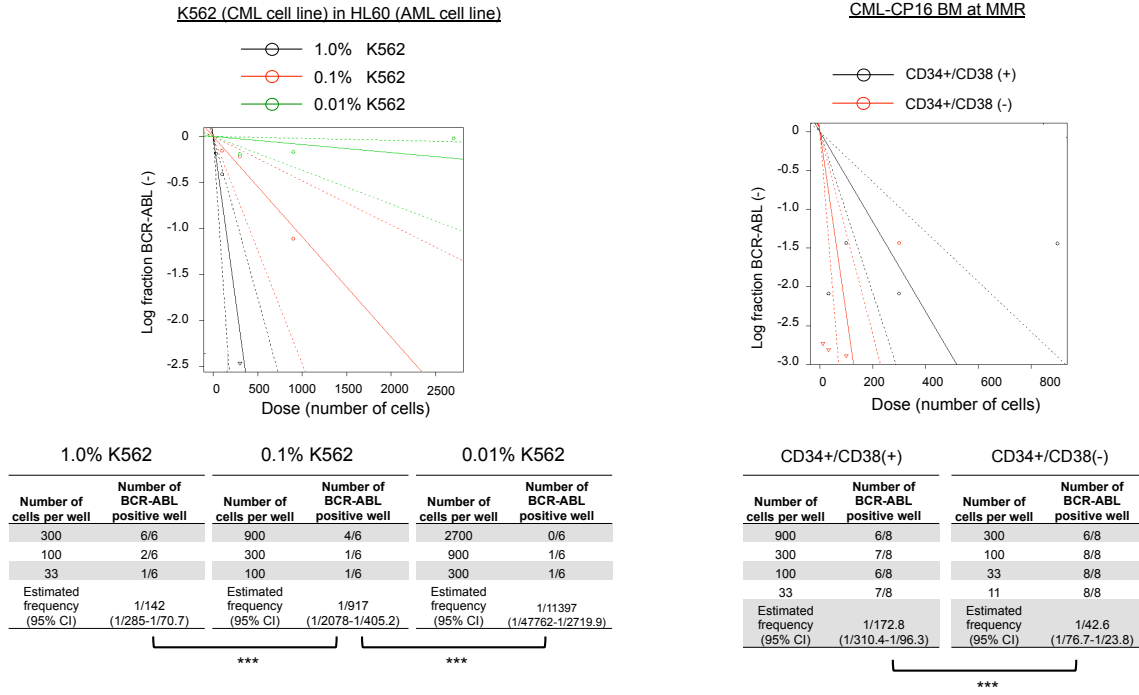

**B**

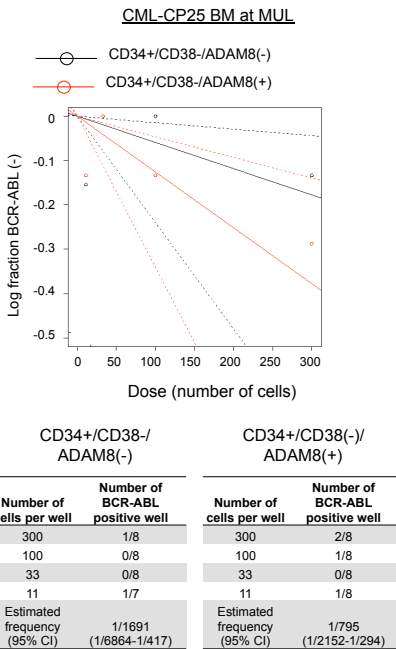

**C**

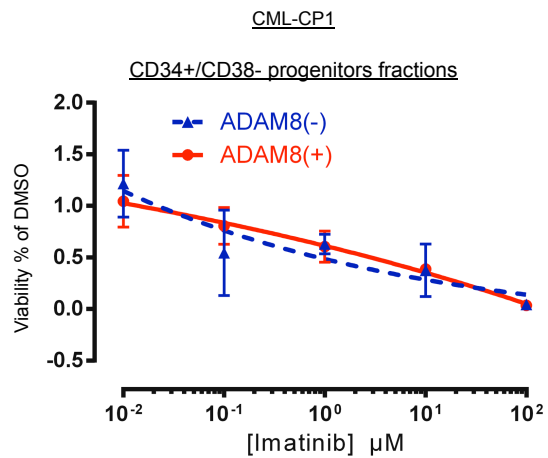



1 **Figure S1. Gene expression profiling of CML-pre-HPCs.** Related to Figure 3

2 (A) The expression of mRNA levels of BCR-ABL in CML-pre-HPCs and CML-DCs. Real-time  
3 quantitative PCR revealed that CML-pre-HPCs showed distinct expression levels of BCR-ABL  
4 from CMP-DCs. Data show means  $\pm$  s.d., n = 3 independent experiments. (*P* values: two-tailed  
5 Student's *t*-test; \* *P* < 0.05)

6 (B) Hierarchical Clustering analysis of gene expression. Samples are included two major clusters,  
7 one consists of pre-HPCs and another consists of DCs. All samples are listed in Supplemental  
8 Table 2.

9 (C) GSEA analysis of CML-pre-HPCs. 20 of all 23 gene sets enriched from 3267 curated gene  
10 sets (false discovery rate q-value < 0.05) are shown. All 23 gene sets enriched from 3267 curated  
11 gene sets are described in Supplemental Table 3.

12  
13 **Figure S2. Overexpression of ADAM8 in CML cell lines.** Related to Figure 4

14 (A) Overexpression of ADAM8-flag in CML cell line. Expression of ADAM8 is confirmed in  
15 two CML cell lines.

16 (B) Viability assay of TKI-resistant cell lines which was previously reported. Viability assay  
17 distinguish TKI-resistant cell lines from sensitive cell lines. Data show means  $\pm$  s.d., n = 3  
18 independent experiments.

19 (C) Viability assay of CML cell lines which express ADAM8. Overexpression of ADAM8 has  
20 no effect on TKI-sensitivity in CML cell lines. Data show means  $\pm$  s.d., n = 3 independent  
21 experiments.

22  
23 **Figure S3. The expression of Adam8 in a murine CML model.** Related to Figure 4

24 (A) Experimental scheme for analysis of Adam8 in a murine CML model.

25 (B) Immunofluorescence microscopy of Adam8 in Lin-/c-Kit+/BCR-ABL+ BM of a murine  
26 CML model. Scale bars: 50  $\mu$ m (left), 10  $\mu$ m (right).

27 (C) The frequency of Adam8+ cells does not show significant difference between DDW cohort  
28 and imatinib cohort. Data show means  $\pm$  s.e.m. n = 2 mice.

29  
30 **Figure S4. Characterization of ADAM8+/CD34+ cells in primary samples of newly  
31 diagnosed CML-CP patients.** Related to Figure 4

32 (A) Microscopy of CD34+/ADAM8+ cells in BM of CML-CP patients at diagnosis. Scale bars:  
33 10  $\mu$ m.

34 (B) FISH analysis of CD34+/ADAM8+ cells. The frequency of *BCR-ABL*+ cells does not show  
35 significant difference between CD34+/ADAM8+ cells and CD34+/ADAM8- cells.

36 (C) The expression of mRNA levels of BCR-ABL in CD34+/ADAM8+ cells. CD34+/ADAM8+  
37 cells had lower expression levels of BCR-ABL than CD34+/ADAM8-. Data show means  $\pm$   
38 s.e.m., n = 2 patients. (*P* values: two-tailed Student's *t*-test; \* *P* < 0.05)

39 (D) The expression of protein levels of BCR-ABL in CD34+/ADAM8+ cells. CD34+/ADAM8+  
40 cells had lower expression levels of BCR-ABL than CD34+/ADAM8-.

41 (E) CFC assay of CD34+/ADAM8+ cells. CFC assay revealed the distinct colony-forming  
42 capacity of CD34+/ADAM8+ cells. Data show means, n = 2, technical replicates.

43 (F) Cell-cycle analysis of CD34+/ADAM8+ cells. CD34+/ADAM8+ cells accumulated in G1  
44 phase of cell cycle. Data show means, n = 2, technical replicates.

1 (G) ADAM8 expression in BM of patients with CML-CP (n = 18), NHL (n = 3) and other  
2 hematological malignancies (AML: n = 1, ALL; n = 1, MDS; n = 1, CMML; n = 3) on FCM  
3 analysis. The frequency of ADAM8+ cells is significantly higher in CD34+.  
4 Data show means  $\pm$  s.e.m. n = shown above, patients. (*P* values: two-tailed Student's *t*-test; \* *P* <  
5 0.05)

6  
7 **Figure S5. ADAM8 expression in patients with the progressive phase of CML.** Related to  
8 Figure 5

9 (A) The expression of ADAM8 in primary sample with progressive phase of CML. Published  
10 array data (GSE47927) showed that primary samples from CML-BC highly expressed ADAM8  
11 in the subpopulations. HSC: hematopoietic stem cell, CMP: common myeloid progenitor, GMP:  
12 granulocyte monocyte progenitor, MEP: megakaryocyte erythroid progenitor. Data show means  
13  $\pm$  s.d. CML-CP; n = 6, CML-AP; n = 4, CML-BC; n = 2 patients.

14  
15 **Figure S6. The frequency of residual CML cells in ADAM8+/CD34+/CD38+ subpopulation**  
16 **of CML-CP patients with optimal TKI response under the treatment of TKI.** Related to  
17 Figure 6

18 (A) Limiting dilution assay of CML cell lines and CD34+/CD38- fractions as controls. Data of  
19 cell line and a patient show n = 1. (CI: confidential interval).

20 (*P* values: chi-square test; \* *P* < 0.05, \*\* *P* < 0.01, \*\*\* *P* < 0.001)

21 (B) The frequency of residual CML cells in ADAM8- and ADAM8+ subpopulation among  
22 CD34+/CD38- fraction. Data of a patient show n = 1.

23 (C) TKI-sensitivity of ADAM8+/CD34+/CD38- cells in a patient with newly diagnosed  
24 CML-CP. Data show means  $\pm$  s.d. n = 3 technical replicates.

25

1 **SUPPLEMENTAL TABLES**

2

3 **Table S1. List of all ES-like clones obtained**

|                     | Clone No. | Stem cell gene expression | Integration check | Teratoma formation | G-banded chromosomal analysis | BCR-ABL expression |
|---------------------|-----------|---------------------------|-------------------|--------------------|-------------------------------|--------------------|
| Healthy donor       | 12        | ○                         | ○                 | ○                  | 46 XY                         |                    |
|                     | 14        | ○                         | ○                 | ○                  | 46 XY                         |                    |
|                     | 17        | ○                         | ○                 | ○                  | 46 XY                         |                    |
| CML-CP patient No.1 | 1         | ○                         |                   |                    |                               |                    |
|                     | 2         |                           |                   |                    |                               |                    |
|                     | 3         | ○                         | ○                 | ○                  | 46 XY t(9;22)                 | ○                  |
|                     | 4         | ○                         |                   |                    |                               | ○                  |
|                     | 5         | ○                         | ○                 | ○                  | 46 XY t(9;22)                 | ○                  |
|                     | 6         | ○                         |                   |                    |                               |                    |
|                     | 7         | ○                         |                   |                    |                               |                    |
|                     | 8         | ○                         | ○                 |                    | 46 XY t(9;22)                 | ○                  |
|                     | 9 to 14   | ○                         |                   |                    |                               | ○                  |
| CML-CP patient No.2 | 1         | ○                         |                   |                    | 46 XY                         | ×                  |
|                     | 2         | ○                         | ○                 |                    |                               | ×                  |
|                     | 3         | ○                         | ○                 | ○                  | 46 XY                         | ×                  |
|                     | 4         | ○                         | ○                 | ○                  | 46 XY t(9;22)                 | ○                  |
|                     | 5         |                           |                   |                    |                               | ×                  |
|                     | 6         | ○                         |                   |                    |                               | ×                  |
|                     | 7         |                           |                   |                    |                               | ×                  |
|                     | 8         | ○                         |                   |                    | 46 XY t(9;22)                 | ○                  |

4

1 **Table S2. Hierarchical Clustering analysis of gene expression profiles**  
 2

| Sample No. | Sample            | Subpopulation | Treatment            |
|------------|-------------------|---------------|----------------------|
| 1          | Normal-iPSCs H_1  | pre-HPCs      | imatinib 2.5 $\mu$ M |
| 2          | CML-iPSCs Pt 1_2  | pre-HPCs      | imatinib 2.5 $\mu$ M |
| 3          | Normal-iPSCs H_2  | pre-HPCs      | imatinib 2.5 $\mu$ M |
| 4          | Normal-iPSCs H_2  | pre-HPCs      | DMSO                 |
| 5          | CML-iPSCs Pt 1_2  | pre-HPCs      | DMSO                 |
| 6          | Normal-iPSCs H_1  | pre-HPCs      | DMSO                 |
| 7          | CML-iPSCs Pt 2    | pre-HPCs      | DMSO                 |
| 8          | CML-iPSCs Pt 2    | pre-HPCs      | imatinib 2.5 $\mu$ M |
| 9          | Normal-iPSCs P t2 | pre-HPCs      | DMSO                 |
| 10         | Normal-iPSCs Pt 2 | pre-HPCs      | imatinib 2.5 $\mu$ M |
| 11         | CML-iPSCs Pt 1_1  | pre-HPCs      | DMSO                 |
| 12         | CML-iPSCs Pt 1_1  | pre-HPCs      | imatinib 2.5 $\mu$ M |
| 13         | CML-iPSCs Pt 1_1  | DCs           | DMSO                 |
| 14         | CML-iPSCs Pt 1_1  | DCs           | imatinib 2.5 $\mu$ M |
| 15         | CML-iPSCs Pt 1_2  | DCs           | DMSO                 |
| 16         | CML-iPSCs Pt 1_2  | DCs           | imatinib 2.5 $\mu$ M |
| 17         | CML-iPSCs Pt 2    | DCs           | DMSO                 |
| 18         | CML-iPSCs Pt 2    | DCs           | imatinib 2.5 $\mu$ M |

3

1 **Table S3. GSEA analysis for CML-pre-HPCs compared to CML-DCs in the absence of**  
 2 **imatinib. 23 gene sets enriched from 3267 curated gene sets (C2) are listed (FDR q-value <**  
 3 **0.05).**  
 4

| No. of gene sets | Names of gene sets                                  | FDR q-value |
|------------------|-----------------------------------------------------|-------------|
| 1                | REACTOME_ABACAVIR_TRANSPORT_AND_METABOLISM          | 0.041       |
| 2                | TANG_SENESCENCE_TP53_TARGETS_UP                     | 0.041       |
| 3                | BIOCARTA_NEUROTRANSMITTERS_PATHWAY                  | 0.041       |
| 4                | WANG_RESPONSE_TO_PACLITAXEL_VIA_MAPK8_UP            | 0.041       |
| 5                | NAKAJIMA_MAST_CELL                                  | 0.041       |
| 6                | VERHAAK_AML_WITH_NPM1_MUTATED_DN                    | 0.041       |
| 7                | WILLIAMS_ESR2_TARGETS_UP                            | 0.041       |
| 8                | REACTOME_NITRIC_OXIDE_STIMULATES_GUANYLATE_CYCLASE  | 0.041       |
| 9                | TAKEDA_TARGETS_OF_NUP98_HOXA9_FUSION_8D_UP          | 0.041       |
| 10               | YAGUE_PRETUMOR_DRUG_RESISTANCE_UP                   | 0.041       |
| 11               | SUMI_HNF4A_TARGETS                                  | 0.041       |
| 12               | LOPEZ_EPITHELIOID_MESOTHELIOMA                      | 0.041       |
| 13               | HOEGERKORP_CD44_TARGETS_TEMPORAL_DN                 | 0.045       |
| 14               | PEPPER_CHRONIC_LYMPHOCYTIC_LEUKEMIA_DN              | 0.045       |
| 15               | TAKEDA_TARGETS_OF_NUP98_HOXA9_FUSION_16D_UP         | 0.045       |
| 16               | REACTOME_GLUCAGON_SIGNALING_IN_METABOLIC_REGULATION | 0.044       |
| 17               | TAKEDA_TARGETS_OF_NUP98_HOXA9_FUSION_3D_UP          | 0.044       |
| 18               | WINTER_HYPOXIA_DN                                   | 0.046       |
| 19               | WAMUNYOKOLI_OVARIAN_CANCER_GRADES_1_2_DN            | 0.046       |
| 20               | NEWMAN_ERCC6_TARGETS_UP                             | 0.046       |
| 21               | CHEN_NEUROBLASTOMA_COPY_NUMBER_GAINS                | 0.046       |
| 22               | WIERENGA_STAT5A_TARGETS_DN                          | 0.048       |
| 23               | OUILLETTE_CLL_13Q14_DELETION_UP                     | 0.048       |

5  
6

1 **Table S4. Characteristics of patients**  
2 Table shows information of patients at the time of diagnosis, whose samples were used in the  
3 present study.  
4 Samples used for the establishment of CML-iPSCs.

| Case No.  | Use                                    | Age | Gender | Ph1 (G-band) | FISH<br><i>BCR-ABL</i> | BCR-ABL type |
|-----------|----------------------------------------|-----|--------|--------------|------------------------|--------------|
| CML-CP 1  | FCM                                    | 66  | Male   | 20/20 (100%) | N/A                    | p210         |
| CML-CP 2  | FCM                                    | 59  | Female | 20/20 (100%) | 180/200 (90%)          | p210 (b3a2)  |
| CML-CP 3  | FCM                                    | 66  | Male   | 20/20 (100%) | 193/200 (96.5%)        | p210 (b3a2)  |
| CML-CP 4  | FCM<br>Establishment of CML-iPSCs Pt.2 | 22  | Male   | 20/20 (100%) | 171/200 (85.5%)        | p210 (b3a2)  |
| CML-CP 5  | FCM                                    | 54  | Female | 20/20 (100%) | 194/200 (97%)          | p210 (b3a2)  |
| CML-CP 6  | FCM                                    | 40  | Male   | 20/20 (100%) | N/A                    | p210 (b3a2)  |
| CML-CP 7  | FCM                                    | 66  | Male   | 20/20 (100%) | 188/200 (94%)          | p210 (b2a2)  |
| CML-CP 8  | FCM                                    | 62  | Female | 19/20 (95%)  | N/A                    | p210 (b3a2)  |
| CML-CP 9  | FCM                                    | 56  | Male   | 20/20 (100%) | N/A                    | p210 (b2a2)  |
| CML-CP 10 | FCM                                    | 65  | Male   | 20/20 (100%) | 192/200 (96%)          | p210 (b2a2)  |
| CML-CP 11 | FCM                                    | 61  | Female | 20/20 (100%) | 196/200 (98%)          | p210 (b3a2)  |
| CML-CP 12 | FCM                                    | 58  | Male   | 19/20 (95%)  | N/A                    | p210 (b3a2)  |
| CML-CP 13 | FCM                                    | 33  | Male   | 16/20 (80%)  | N/A                    | p210 (b3a2)  |
| CML-CP 14 | FCM                                    | 51  | Female | 17/20 (85%)  | N/A                    | p210 (b2a2)  |
| CML-CP 15 | FCM                                    | 65  | Male   | 20/20 (100%) | N/A                    | p210 (b3a2)  |
| CML-CP 16 | FCM<br>Limiting dilution assay         | 42  | Male   | 20/20 (100%) | N/A                    | p210 (b2a2)  |
| CML-CP 17 | FCM                                    | 75  | Female | 20/20 (100%) | 192/200 (96%)          | p210 (b2a2)  |
| CML-CP 18 | FCM                                    | 54  | Female | 20/20 (100%) | N/A                    | p210 (b3a2)  |
| CML-CP 19 | FCM                                    | 63  | Female | 20/20 (100%) | 186/200 (93%)          | p210 (b3a2)  |
| CML-CP 20 | FCM                                    | 51  | Female | 19/20 (95%)  | 192/200 (96%)          | p210 (b3a2)  |
| CML-CP 21 | FCM                                    | 35  | Male   | 20/20 (100%) | N/A                    | p210         |
| CML-CP 22 | FCM                                    | 86  | Male   | 20/20 (100%) | 193/200 (96.5%)        | p210 (b2a2)  |
| CML-CP 23 | FCM                                    | 23  | Female | 20/20 (100%) | N/A                    | p210 (b3a2)  |
| CML-CP 24 | Limiting dilution assay                | 67  | Female | 20/20 (100%) | N/A                    | p210 (b3a2)  |
| CML-CP 25 | Limiting dilution assay                | 49  | Female | 20/20 (100%) | N/A                    | p210 (b3a2)  |
| CML-CP 26 | Establishment of CML-iPSCs Pt.1        | 44  | Male   | 20/20 (100%) | N/A                    | p210 (b3a2)  |

5  
6

1 **Table S5. List of antibodies for flow cytometry**  
 2 Each table shows antibodies used for mouse cells and human cells.  
 3 Mouse

| <b>Epitope</b> | <b>Clone</b> | <b>Fluorophore</b> | <b>Supplier</b> |
|----------------|--------------|--------------------|-----------------|
| Gr-1           | RB6-8C5      | Biotin             | BioLegend       |
| Mac-1          | M1/70        | Biotin             | BioLegend       |
| B220           | RA3-6B2      | Biotin             | BioLegend       |
| TER-119        | TER-119      | Biotin             | BioLegend       |
| CD3ε           | 145-2C11     | Biotin             | BioLegend       |
| CD4            | GK1.5        | Biotin             | BioLegend       |
| CD8a           | 53-6.7       | Biotin             | BioLegend       |
| CD127          | A7R34        | Biotin             | BioLegend       |
| Sca-1          | E13-161.7    | APC-Cy7            | BioLegend       |
| c-Kit          | 2B8          | PE-Cy7             | BioLegend       |

4  
 5 Human

| <b>Epitope</b> | <b>Clone</b> | <b>Fluorophore</b> | <b>Supplier</b>     |
|----------------|--------------|--------------------|---------------------|
| CD34           | 581          | PE-Cy7             | Biolegend           |
|                | 4H11         | APC                | eBioscience         |
| CD38           | HIT2         | FITC               | Biolegend           |
| CD43           | DFT1         | PE                 | BECKMAN<br>COULTER  |
|                | 4-29-5-10-21 | PerCP-eFluor 710   | eBioscience         |
| CD45           | H130         | APC                | Biolegend           |
| CD90           | 5E10         | Alexa Fluor 647    | Biolegend           |
| ADAM8          | REA331       | PE                 | Miltenyi Biotec     |
|                | REA331       | APC                | Miltenyi Biotec     |
| IgG isotype    | MOPC-21      | Alexa Fluor 647    | Biolegend           |
| IgG isotype    | 679.1Mc7     | PE                 | BECKMAbN<br>COULTER |

6

1 **Table S6. List of primers**

| Gene                      | Use               | Forward                    | Reverse                        |
|---------------------------|-------------------|----------------------------|--------------------------------|
| <i>ILIRL1</i>             | real-time qPCR    | ATGGGGTTTTGGATCTTAGCAAT    | CACGGTGTAAGTGGTTTTCTT          |
| <i>MEIS1</i>              | real-time qPCR    | GATATAGCCGTGTTCCGCAAA      | CGGTGGCAGAAATTGTCACAT          |
| <i>ADAM8</i>              | real-time qPCR    | CGATGATGCTGCCTGCGATTG      | CGCAGGTGGAGGGTGAAGTT           |
| <i>BCR-ABL</i>            | real-time qPCR    | AACTCCAGACTGTCCACAGCA      | AACGAGCGGCTTCACTCA             |
| <i>18s RNA</i>            | real-time qPCR    | GTAACCCGTTGAACCCATT        | CCATCCAATCGGTAGTAGCG           |
| <i>OCT3/4</i>             | RT-PCR            | CCCCAGGGCCCCATTTTGGTACC    | ACCTCAGTTTGAATGCATGGGAGAGC     |
| <i>OCT3/4 (transgene)</i> | RT-PCR            | CATTCAAAGTGAAGGTAAGGG      | TAGCGTAAAAGGAGCAACATAG         |
| <i>KLF4</i>               | RT-PCR            | ACCCATCCTTCTGCCGATCAGA     | TTGGTAATGGAGCGGGGACTTG         |
| <i>KLF4 (transgene)</i>   | RT-PCR            | CCACCTCGCCTTACACATGAAGA    | TAGCGTAAAAGGAGCAACATAG         |
| <i>SOX2</i>               | RT-PCR            | TTCACATGTCCCAGCACTACCAGA   | TCACATGTGTGAGAGGGGCAGTGTGC     |
| <i>SOX2 (transgene)</i>   | RT-PCR            | TTCACATGTCCCAGCACTACCAGA   | TTTGTGTTGACAGGAGCGACAAT        |
| <i>L-MYC</i>              | RT-PCR            | GCGAACCCAAGACCCAGGCCTGCTCC | CAGGGGGTCTGCTCGCACCGTGATG      |
| <i>L-MYC (transgene)</i>  | RT-PCR            | GGCTGAGAAGAGGATGGCTAC      | TTTGTGTTGACAGGAGCGACAAT        |
| <i>LIN28</i>              | RT-PCR            | AGCCATATGGTAGCCTCATGTCCGC  | TCAATTCTGTGCCTCCGGGAGCAGGGTAGG |
| <i>LIN28 (transgene)</i>  | RT-PCR            | AGCCATATGGTAGCCTCATGTCCGC  | TAGCGTAAAAGGAGCAACATAG         |
| <i>EBNA-1 (transgene)</i> | RT-PCR            | ATCAGGGCCAAGACATAGAGATG    | GCCAATGCAACTTGGACGTT           |
| <i>GAPDH</i>              | RT-PCR            | ACCACAGTCCATGCCATCAC       | TCCACCACCCTGTTGCTGTA           |
| <i>BCR-ABL</i>            | Pre-amplification | AGAAGCTTCTCCCTGACATCCG     | GGTACCAGGAGTGTCTTCTCCAGACTG    |
|                           | one-step RT-PCR   | TGAAACTCCAGACTGTCC         | TCAGACCCTGAGGCTCAAAG           |
| <i>ACTINB</i>             | Pre-amplification | CCAACCGCGAGAAGATGAC        | TAGCACAGCCTGGATAGCAA           |
|                           | one-step RT-PCR   | CGCGAGAAGATGACCCAGAT       | CACAGCCTGGATAGCAACGT           |

2  
3



1 **SUPPLEMENTAL REFERENCES**

2 Wilson, A., Laurenti, E., Oser, G., van der Wath, R. C., Blanco-Bose, W., Jaworski, M., Offner,  
3 S., Dunant, C. F., Eshkind, L., Bockamp, E., *et al.* (2008) Hematopoietic Stem Cells Reversibly  
4 Switch from Dormancy to Self-Renewal during Homeostasis and Repair, *Cell*, 135, 1118–1129.

5
